# Supplementary material
Source: MDPI journal article supplement (https://www.mdpi.com/2073-4344/12/11/1489)
Supplement: s1 [file s1]

## Supplementary Materials

### Visible-Light-Active Vanadium and Copper Co-Doped gCN Nanosheets with Double Direct Z-Scheme Heterojunctions for Photocatalytic Removal of Monocrotophos Pesticide in Water

Dhanapal Vasu <sup>1,2,\*</sup>, Arjunan Karthi Keyan <sup>1,2</sup>, Subramanian Sakthinathan <sup>1,2</sup>, Chung-Lun Yu <sup>1,2</sup>, Yu-Feng You <sup>1,2</sup>, Te-Wei Chiu <sup>1,2,\*</sup>, Liangdong Fan <sup>3,\*</sup> and Po-Chou Chen <sup>4,5</sup>

<sup>1</sup> Department of Materials and Mineral Resources Engineering, National Taipei University of Technology, No. 1, Section 3, Chung-Hsiao East Road, Taipei 106, Taiwan

<sup>2</sup> Institute of Materials Science and Engineering, National Taipei University of Technology, No. 1, Section 3, Chung-Hsiao East Road, Taipei 106, Taiwan

<sup>3</sup> Department of New Energy Science and Technology, College of Chemistry and Environmental Engineering, Shenzhen University, 3688 Nanhai Ave., Shenzhen 518060, China

<sup>4</sup> Graduate Institute of Organic and Polymeric Materials, National Taipei University of Technology, Taipei 10553, Taiwan

<sup>5</sup> E-Current Co Ltd., 10F.-5, No. 50, Sec. 4, Nanjing E. Rd., Songshan Dist., Taipei 10553, Taiwan

\* Correspondence: tewei@ntut.edu.tw (T.-W.C.); fanld@szu.edu.cn (L.F.)

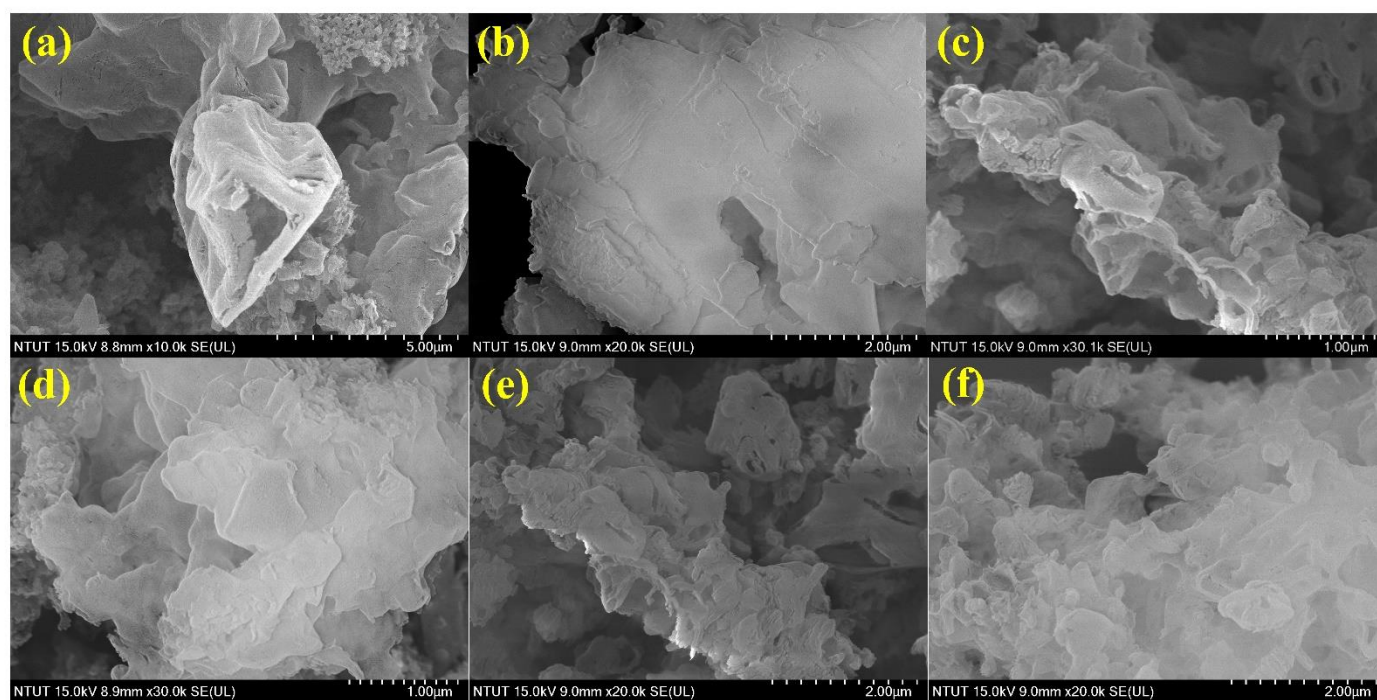

**Figure S1.** Surface morphologies studies of bulk gCN and V/Cu/gCN nanosheets, (a) bulk gCN (b) VC-1, (c) VC-2, (d) VC-3, (e) VC-4, and (f) VC-5.
